# Supplementary material for: Aminoglycoside-Modifying Enzymes Are Sufficient to Make Pseudomonas aeruginosa Clinically Resistant to Key Antibiotics
Source: MDPI journal article supplement (doi:10.3390/antibiotics11070884), 2022-07-01
Supplement: s1 [file s1]

## Supporting material

**Aminoglycoside-modifying enzymes are sufficient to make *Pseudomonas aeruginosa* clinically resistant to key antibiotics**

**Authors:** A. Thacharodi and I. L. Lamont.

Table S2: Aminoglycoside-modifying enzymes identified in this study

Table S3: Transposable elements in *P. aeruginosa* isolates analysed in this study

Table S4: MICs of *P. aeruginosa* containing pSW196

Table S5: Bacterial isolates and plasmids used in this study

Table S6: Primers used in this study

**Table S2.** Aminoglycoside modifying enzymes identified in this study<sup>a</sup>

|                                           | Enzymes             | Genetic location              | Accession Number   | Resistance <sup>b</sup> | Prevalence % <sup>b</sup> |      |      | Comments                                                                                      | Isolates contain AMEs                                                         | Ref   |
|-------------------------------------------|---------------------|-------------------------------|--------------------|-------------------------|---------------------------|------|------|-----------------------------------------------------------------------------------------------|-------------------------------------------------------------------------------|-------|
|                                           |                     |                               |                    |                         | C                         | P    | W    |                                                                                               |                                                                               |       |
| <i>Aminoglycoside N-acetyltransferase</i> |                     |                               |                    |                         |                           |      |      |                                                                                               |                                                                               |       |
| 1                                         | Aac(2′)-IIa         | Plasmid, integron             | AB669090           | KSM                     | 0.38                      | 0.0  | 0.02 | Found in <i>B. glumae</i> and <i>A. avenae</i>                                                | PAC14B                                                                        | [1]   |
| 2                                         | Aac(3)-I            | Integron, transposon          | AJ877225           | G                       | -                         | -    | -    | Reported in integron cassette of <i>P. aeruginosa</i>                                         | A106                                                                          | [2,3] |
| 3                                         | Aac(3)-Ia           | Plasmid, transposon, integron | X15852<br>AF550679 | G                       | 0.0                       | 0.0  | 0.88 | Found in <i>P. aeruginosa</i> , <i>E. coli</i> , <i>K. pneumoniae</i> and <i>A. baumannii</i> | EC2A, 403-104                                                                 | [4]   |
| 4                                         | Aac(3)-IIa          | Plasmid                       | X13543             | T, G                    | 0.0                       | 0.0  | 0.02 | Reported in <i>P. aeruginosa</i> and <i>E. coli</i>                                           | 197S020911BSL_PA3                                                             | [5]   |
| 5                                         | Aac(3)-IIIc         | Not known                     | L06161             | T, G, K, N, P           | 0.0                       | 0.0  | 0.02 | Reported in <i>P. aeruginosa</i> . Rarely reported in <i>Enterobacteriaceae</i>               | AUS106, 403-102                                                               | [6]   |
| 6                                         | Aac(3)-IV           | Plasmid                       | X01385             | T, G                    | 0.0                       | 0.0  | 0.04 | Binds to apramycin and gentamicin, Commonly found in <i>Salmonella spp.</i>                   | 6102, 6000.3                                                                  | [7]   |
| 7                                         | Aac(6′)-Ib3 (aacA4) | Integron                      | X60321             | T, N, K, G              | 0.0                       | 0.0  | 0.33 | AAC (6′)-Ib has been described in a few CF patient isolates resistant to tobramycin           | HCF73, 1257147, 1260990, 1275655, 1344658, 1420275, 1690076, 1295835, 1586994 | [8]   |
| 8                                         | Aac(6′)-II (aacA7)  | Plasmid, integron             | U13880             | T, G                    | 0.0                       | 1.92 | 2.08 | Aac(6′)-II enzymes catalyze acetylation                                                       | 1301482, 1324459, 1586981                                                     | [9]   |

|                                                 |                        |                                     |          |                     |      |      |      |                                                                                                                                                                                |                                                                                                                                                                                                                                    |      |
|-------------------------------------------------|------------------------|-------------------------------------|----------|---------------------|------|------|------|--------------------------------------------------------------------------------------------------------------------------------------------------------------------------------|------------------------------------------------------------------------------------------------------------------------------------------------------------------------------------------------------------------------------------|------|
|                                                 |                        |                                     |          |                     |      |      |      | of all forms of<br>gentamicin but not<br>of amikacin                                                                                                                           |                                                                                                                                                                                                                                    |      |
|                                                 |                        |                                     |          |                     |      |      |      | Observed in <i>P.</i><br><i>aeruginosa</i>                                                                                                                                     |                                                                                                                                                                                                                                    |      |
| 9                                               | Aac(6')-IIa            | Plasmid,<br>Integron                | M29695   | T, G                | 0.0  | 0.0  | 0.35 | Common among <i>P.</i><br><i>aeruginosa</i> and <i>S.</i><br><i>enterica</i>                                                                                                   | 5994                                                                                                                                                                                                                               | [10] |
| 10                                              | Aac(6')-31             | Integron                            | AM283348 | A, T, G, K,<br>N, I | 0.0  | 0.0  | 0.71 | Observed in <i>P.</i><br><i>putida</i> , <i>A.</i><br><i>baumannii</i> and <i>K.</i><br><i>pneumoniae</i>                                                                      | 1586981                                                                                                                                                                                                                            | [11] |
| 11                                              | Aac(6')-33             | Integron                            | GQ337064 | A, T                | 0.0  | 0.0  | 0.20 | Observed in <i>P.</i><br><i>aeruginosa</i>                                                                                                                                     | 1275655, 1420275,<br>1690076                                                                                                                                                                                                       | [12] |
| <b>Aminoglycoside O-nucleotidyltransferases</b> |                        |                                     |          |                     |      |      |      |                                                                                                                                                                                |                                                                                                                                                                                                                                    |      |
| 12                                              | Ant (2'')-Ia<br>(aadB) | Plasmid,<br>Integron                | X04555   | T, G, K             | 3.07 | 5.77 | 4.82 | Found in<br>gentamicin-resistant<br>and tobramycin-<br>resistant clinical<br>isolates of <i>P.</i><br><i>aeruginosa</i> .<br>Widespread among<br>all gram-negative<br>bacteria | 2D9A, 5999.1<br>5999.2<br>5999.3<br>318S170811BSL_PA1<br>298S020611BSL_PA1<br>278S180511BSL_PA2<br>278S180511BSL_PA1<br>66S100212BSL__PA1<br>008A1, A106, 403-<br>105, 1268230<br>1271701, 1257147,<br>1324459, 1607533,<br>AUS720 | [5]  |
| 13                                              | AadA1<br>(Ant(3'')-Ia) | Plasmid,<br>Integron,<br>Transposon | X02340   | S                   | 3.07 | 1.92 | 1.7  | Found among<br>Enterobacteriaceae,<br><i>A. baumannii</i> , <i>P.</i><br><i>aeruginosa</i> and<br><i>Vibrio cholerae</i>                                                       | 1271701, 1324459                                                                                                                                                                                                                   | [13] |

|                                      |                      |                                                         |                        |            |               |      |      |                                                                                                                                     |                                                                                                                               |      |
|--------------------------------------|----------------------|---------------------------------------------------------|------------------------|------------|---------------|------|------|-------------------------------------------------------------------------------------------------------------------------------------|-------------------------------------------------------------------------------------------------------------------------------|------|
| 14                                   | AadA1b<br>(Ant(3"))  | Plasmid,<br>Integron,<br>Transposon                     | M95287                 | S          | 3.94          | 1.03 | 1.74 | Common in<br><i>Enterobacteriaceae</i> ,<br><i>A. baumannii</i> , <i>P.</i><br><i>aeruginosa</i> and <i>V.</i><br><i>cholerae</i> . | 1275655,<br>1420275,1690076                                                                                                   | [14] |
| 15                                   | AadA2<br>(Ant(3"))   | Plasmid,<br>integron                                    | NC_010870              | S          | 0.0           | 0.0  | 1.06 | Common in <i>K.</i><br><i>pneumoniae</i> and<br><i>Salmonella spp.</i>                                                              | 318S170811BSL_PA1                                                                                                             | [14] |
| 16                                   | AadA2b<br>(Ant(3"))  | Plasmid,<br>Integron                                    | D43625                 | S          | 0.0           | 0.0  | 1.0  | Located on integron<br>InC, Isolated from<br>the R-plasmid of <i>P.</i><br><i>aeruginosa</i> , as a<br>gene cassette                | 5999.1<br>5999.2<br>5994, 5999.3<br>66S100212BSL__PA1,<br>1344658                                                             | [15] |
| 17                                   | AadA4<br>(Ant(3"))   | Plasmid,<br>Chromosome                                  | NC_002928<br>NC_010558 | S          | 0.38          | 0.0  | 0.07 | Found in <i>Bordetella</i><br><i>parapertussis</i> and <i>E.</i><br><i>coli</i>                                                     | A106                                                                                                                          | [16] |
| 18                                   | AadA6<br>(Ant(3"))   | Integron                                                | AM087411               | S          | 1.53          | 0.0  | 4.15 | Found encoded in<br>the integron of <i>P.</i><br><i>aeruginosa</i>                                                                  | SMC1587,<br>4064320487<br>272S250511BSL_PA1<br>1260990, 1586981,<br>1586994, 5014375233                                       | [17] |
| 19                                   | AadD<br>(Ant(4')-Ia) | Plasmid                                                 | U35229                 | A, T, K, N | Not available |      |      | Common among <i>S.</i><br><i>epidermidis</i> , <i>S.</i><br><i>aureus</i> ,<br><i>Enterococcus spp.</i><br>and <i>Bacillus spp</i>  | 6099                                                                                                                          | [18] |
| Aminoglycoside O-phosphotransferases |                      |                                                         |                        |            |               |      |      |                                                                                                                                     |                                                                                                                               |      |
| 20                                   | Aph(3'')-Ib          | Plasmid,<br>Transposons,<br>chromosomes,<br>IC elements | M28829                 | S          | 0.77          | 0.0  | 0.22 | Found in <i>P.</i><br><i>aeruginosa</i> and <i>E.</i><br><i>coli</i>                                                                | 3C52, AT31, HCF73,<br>5, 298S020611BSL_PA1<br>278S180511BSL_PA2<br>286S270711BSL_PA1<br>278S180511BSL_PA1<br>66S100212BSL_PA1 | [19] |

|    |                           |                                                          |        |                       |      |       |      |                                                                                                                                                                                                            |                                                                                                                                                                         |      |
|----|---------------------------|----------------------------------------------------------|--------|-----------------------|------|-------|------|------------------------------------------------------------------------------------------------------------------------------------------------------------------------------------------------------------|-------------------------------------------------------------------------------------------------------------------------------------------------------------------------|------|
|    |                           |                                                          |        |                       |      |       |      |                                                                                                                                                                                                            | C54, 1313352,<br>1257147, 1344658,<br>1607533                                                                                                                           |      |
| 21 | Aph(3')-IIa<br>(AphA-2)   | Transposon                                               | V00618 | K, N, P,<br>GmB       | 0.38 | 1.92  | 0.53 | Common among <i>E. coli</i>                                                                                                                                                                                | 1275655                                                                                                                                                                 | [20] |
| 22 | Aph(3')-VIa<br>(AphA-6)   | Plasmid<br>Chromosome                                    | X07753 | A, K, N, P,<br>GmB, I | 2.31 | 0     | 0.92 | Primarily isolated from <i>Acinetobacter spp.</i><br><br>Was cloned into <i>E. coli</i> to study amikacin resistance                                                                                       | 1260990                                                                                                                                                                 | [21] |
| 23 | Aph(4)-Ia                 | Plasmid                                                  | V01499 | HygB                  | 0.0  | 0.0   | 0.04 | Found among <i>E. coli</i>                                                                                                                                                                                 | 6102, 6000.3                                                                                                                                                            | [22] |
| 24 | Aph(6)-Ic<br>(str sph)    | Transposon                                               | X01702 | S                     | 0.38 | 0.0   | 0.24 | Found in <i>S. enterica</i> , <i>P. aeruginosa</i> and <i>E. coli</i> .                                                                                                                                    | 1275655                                                                                                                                                                 |      |
| 25 | Aph(6)-Id<br>(strB, orfI) | Plasmid,<br>Transposons,<br>chromosomes,<br>IC elements, | M28829 | S                     | 4.6  | 11.54 | 4.88 | APH (6)-Id is a streptomycin phosphotransferase<br><br>Found in <i>K. pneumoniae</i> , <i>Salmonella spp.</i> , <i>E. coli</i> , <i>Shigella flexneri</i> , <i>Pseudomonas spp.</i> , <i>V. cholerae</i> . | 3C52, AT31, 5,<br>298S020611BSL_PA1<br>278S180511BSL_PA2<br>286S270711BSL_PA1<br>278S180511BSL_PA1<br>66S100212BSL_PA1<br>C54, 1313352,<br>1257147, 1344658,<br>1607533 | [23] |

<sup>a</sup>Genes encoding aminoglycoside-modifying enzymes were identified using ResFinder 4.1 [24] and confirmed with Resistance Gene Identifier (RGI) version 4.2.2 with information drawn from the CARD database 3.0.1[25].

<sup>b</sup>Abbreviations: Resistance: P- paromycin, I- isepamicin, A-amikacin; G-gentamicin, GmB- gentamicin B; K-kanamycin; N-neomycin; S-streptomycin; T-tobramycin, HygB-hygromycin B, KSM-kasugamycin; Prevalence %: C- NCBI Chromosome, P- NCBI Plasmid, W- NCBI WGS



**Table S3. Transposable elements in clinical isolates of *P. aeruginosa*<sup>a</sup>**

| MLST            | MGE                                 | Resistance Genes      | Phenotype                                                                                                                                        | Accession    |
|-----------------|-------------------------------------|-----------------------|--------------------------------------------------------------------------------------------------------------------------------------------------|--------------|
| Isolate 1257147 |                                     |                       |                                                                                                                                                  |              |
| 235             | Tn6082<br>Unit Transposon           | <i>aac(6')-Ib-cr</i>  | ciprofloxacin, tobramycin,<br>amikacin                                                                                                           | EF636461     |
|                 |                                     | <i>sulI</i>           | sulfamethoxazole                                                                                                                                 | U12338       |
|                 |                                     | <i>aph(3'')-Ib</i>    | streptomycin                                                                                                                                     | AF024602     |
|                 |                                     | <i>aph(6)-Id</i>      | streptomycin                                                                                                                                     | M28829       |
|                 |                                     | <i>dfrA5</i>          | trimethoprim                                                                                                                                     | X12868       |
|                 |                                     | <i>aac(6')-Ib3</i>    | tobramycin, amikacin                                                                                                                             | X60321       |
|                 |                                     | <i>blaOXA-17</i>      | cefotaxime, ampicillin,<br>cefepime, ceftazidime,<br>cefixime, aztreonam,<br>amoxicillin                                                         | DQ902344     |
|                 |                                     | <i>ant(2'')-Ia</i>    | tobramycin, gentamicin                                                                                                                           | JF826500     |
|                 |                                     | <i>qacE</i>           | chlorhexidine, benzylkonium<br>chloride, ethidium bromide,<br>cetylpyridinium chloride                                                           | X68232       |
|                 | <i>blaOXA-129</i>                   | unknown beta-lactam   | FJWZ01000025                                                                                                                                     |              |
|                 | ISPa7<br>Composite<br>transposon    | <i>fosA</i>           | fosfomycin                                                                                                                                       | ACWU01000146 |
|                 |                                     | <i>cmx</i>            | chloramphenicol                                                                                                                                  | U85507       |
|                 | ISPa7<br>Composite<br>transposon    | <i>aac (6')-Ib-cr</i> | ciprofloxacin, tobramycin,<br>amikacin                                                                                                           | EF636461     |
|                 |                                     | <i>catB3</i>          | chloramphenicol                                                                                                                                  | U13880       |
|                 |                                     | <i>qacE</i>           | chlorhexidine, benzylkonium<br>chloride, ethidium bromide,<br>cetylpyridinium chloride                                                           | X68232       |
|                 |                                     | <i>sulI</i>           | sulfamethoxazole                                                                                                                                 | U12338       |
|                 |                                     | <i>blaOXA-1</i>       | ampicillin+clavulanic acid,<br>amoxicillin+clavulanic acid,<br>ampicillin,<br>piperacillin+tazobactam,<br>piperacillin, cefepime,<br>amoxicillin | HQ170510     |
|                 |                                     | <i>ARR-3</i>          | rifampicin                                                                                                                                       | JF806499     |
| Isolate 1260990 |                                     |                       |                                                                                                                                                  |              |
| 395             | ISPa1635<br>Composite<br>transposon | <i>fosA</i>           | fosfomycin                                                                                                                                       | ACWU01000146 |
|                 |                                     | <i>sulI</i>           | sulfamethoxazole                                                                                                                                 | U12338       |
|                 |                                     | <i>qacE</i>           | ethidium bromide,<br>chlorhexidine, benzylkonium<br>chloride, cetylpyridinium<br>chloride                                                        | X68232       |
|                 |                                     | <i>blaVIM-2</i>       | piperacillin,<br>piperacillin+tazobactam,<br>ceftazidime, cefixime,<br>ertapenem, meropenem,                                                     | AF302086     |

|                 |                             |                      |                                                                                                                                     |              |
|-----------------|-----------------------------|----------------------|-------------------------------------------------------------------------------------------------------------------------------------|--------------|
|                 |                             |                      | amoxicillin, cefepime, amoxicillin+clavulanic acid, imipenem, ampicillin, cefoxitin, ampicillin+clavulanic acid, cefotaxime         |              |
|                 |                             | <i>aph(3')-VIa</i>   | gentamicin, amikacin, butirosin, kanamycin, paromomycin, neomycin, ribostamycin                                                     | X07753       |
|                 |                             | <i>qacE</i>          | ethidium bromide, chlorhexidine, benzylkonium chloride, cetylpyridinium chloride                                                    | X68232       |
|                 |                             | <i>aac(6')-Ib-cr</i> | ciprofloxacin, amikacin, tobramycin                                                                                                 | EF636461     |
|                 |                             | <i>aadA6</i>         | spectinomycin, streptomycin                                                                                                         | AF140629     |
|                 |                             | <i>aac(6')-Ib3</i>   | amikacin, tobramycin                                                                                                                | X60321       |
|                 |                             | <i>blaOXA-10</i>     | piperacillin, piperacillin+tazobactam, aztreonam, amoxicillin, ampicillin                                                           | J03427       |
|                 |                             | <i>catB7</i>         | chloramphenicol                                                                                                                     | AF036933     |
|                 |                             | <i>crpP</i>          | ciprofloxacin                                                                                                                       | HM560971     |
| Isolate 1275655 |                             |                      |                                                                                                                                     |              |
| 235             | Tn5563                      | <i>fosA</i>          | fosfomycin                                                                                                                          | ACWU01000146 |
|                 |                             | <i>aph(6)-Ic</i>     | streptomycin                                                                                                                        | X01702       |
|                 |                             | <i>aph(3')-IIa</i>   | neomycin, kanamycin                                                                                                                 | V00618       |
|                 | IS6100 Composite transposon | <i>aac(6')-33</i>    | tobramycin, amikacin                                                                                                                | GQ337064     |
|                 |                             | <i>blaGES-19</i>     | ticarcillin, ampicillin+clavulanic acid, piperacillin, cefoxitin, ampicillin, amoxicillin, amoxicillin+clavulanic acid, ceftazidime | JN596280     |
|                 |                             | <i>qacE</i>          | benzylkonium chloride, ethidium bromide, chlorhexidine, cetylpyridinium chloride                                                    | X68232       |
|                 |                             | <i>sulI</i>          | sulfamethoxazole                                                                                                                    | X15024       |
|                 |                             | <i>blaGES-20</i>     | ticarcillin, ampicillin+clavulanic acid, piperacillin, cefoxitin, ampicillin, amoxicillin, amoxicillin+clavulanic acid, ceftazidime | JN596280     |
|                 |                             | <i>aac(6')-Ib-cr</i> | tobramycin, amikacin, ciprofloxacin,                                                                                                | EF636461     |
|                 |                             | <i>blaOXA-2</i>      | ampicillin+clavulanic acid, piperacillin, ampicillin, amoxicillin, amoxicillin+clavulanic acid, ceftazidime                         | DQ112222     |
|                 |                             | <i>aac(6')-Ib3</i>   | tobramycin, amikacin                                                                                                                | X60321       |
|                 |                             |                      |                                                                                                                                     |              |



|                        |                           |                      |                                                                                                                                                                                                                                                       |              |
|------------------------|---------------------------|----------------------|-------------------------------------------------------------------------------------------------------------------------------------------------------------------------------------------------------------------------------------------------------|--------------|
|                        |                           | <i>ant(2'')-Ia</i>   | gentamicin, tobramycin                                                                                                                                                                                                                                | X04555       |
| <b>Isolate 1324459</b> |                           |                      |                                                                                                                                                                                                                                                       |              |
| 357                    | Tn4661<br>Unit Transposon | <i>fosA</i>          | fosfomycin                                                                                                                                                                                                                                            | ACWU01000146 |
|                        |                           | <i>blaVEB-1</i>      | aztreonam,<br>ticarcillin+clavulanic acid,<br>cefotaxime, cefoxitin,<br>cefepime, ticarcillin,<br>amoxicillin,<br>piperacillin+tazobactam,<br>amoxicillin+clavulanic acid,<br>ampicillin, ceftazidime,<br>ampicillin+clavulanic acid,<br>piperacillin | HM370393     |
|                        |                           | <i>ant(2'')-Ia</i>   | tobramycin, gentamicin                                                                                                                                                                                                                                | X04555       |
|                        |                           | <i>crpP</i>          | ciprofloxacin                                                                                                                                                                                                                                         | HM560971     |
|                        |                           | <i>dfrB2</i>         | trimethoprim                                                                                                                                                                                                                                          | AY553333     |
|                        |                           | <i>blaOXA-10</i>     | aztreonam, amoxicillin,<br>piperacillin+tazobactam,<br>ampicillin, piperacillin                                                                                                                                                                       | J03427       |
|                        |                           | <i>aac(6')-II</i>    | amikacin, tobramycin                                                                                                                                                                                                                                  | U13880       |
|                        |                           | <i>tet(A)</i>        | tetracycline, doxycycline                                                                                                                                                                                                                             | AY196695     |
|                        |                           | <i>qacE</i>          | benzylkonium chloride,<br>chlorhexidine, ethidium<br>bromide, cetylpyridinium<br>chloride                                                                                                                                                             | X68232       |
|                        |                           | <i>sulI</i>          | sulfamethoxazole                                                                                                                                                                                                                                      | U12338       |
|                        |                           | <i>catB7</i>         | chloramphenicol                                                                                                                                                                                                                                       | AF036933     |
| <b>Isolate 1420275</b> |                           |                      |                                                                                                                                                                                                                                                       |              |
| 309                    | Tn5563<br>Unit transposon | <i>fosA</i>          | fosfomycin                                                                                                                                                                                                                                            | ACWU01000146 |
|                        |                           | <i>aac(6')-33</i>    | amikacin, tobramycin                                                                                                                                                                                                                                  | GQ337064     |
|                        |                           | <i>qacE</i>          | benzylkonium chloride,<br>chlorhexidine,<br>cetylpyridinium chloride,<br>ethidium bromide                                                                                                                                                             | X68232       |
|                        |                           | <i>sulI</i>          | sulfamethoxazole                                                                                                                                                                                                                                      | X15024       |
|                        |                           | <i>blaGES-20</i>     | piperacillin, amoxicillin,<br>amoxicillin+clavulanic acid,<br>ampicillin+clavulanic acid,<br>ampicillin, ticarcillin,<br>ceftazidime, cefoxitin                                                                                                       | JN596280     |
|                        |                           | <i>aac(6')-Ib-cr</i> | ciprofloxacin, amikacin,<br>tobramycin                                                                                                                                                                                                                | EF636461     |
|                        |                           | <i>blaOXA-2</i>      | piperacillin, amoxicillin,<br>amoxicillin+clavulanic acid,<br>ampicillin+clavulanic acid,<br>ampicillin, ceftazidime                                                                                                                                  | DQ112222     |
|                        |                           | <i>aac(6')-Ib3</i>   | amikacin, tobramycin                                                                                                                                                                                                                                  | X60321       |
|                        |                           | <i>ant(2'')-Ia</i>   | gentamicin, tobramycin                                                                                                                                                                                                                                | M95287       |
|                        |                           | <i>catB7</i>         | chloramphenicol                                                                                                                                                                                                                                       | AF036933     |
|                        |                           | <i>crpP</i>          | ciprofloxacin                                                                                                                                                                                                                                         | HM560971     |
|                        |                           | <i>blaGES-19</i>     | piperacillin, amoxicillin,<br>amoxicillin+clavulanic acid,<br>ampicillin+clavulanic acid,                                                                                                                                                             | JN596280     |

|                 |                                   |                    |                                                                                                                         |              |
|-----------------|-----------------------------------|--------------------|-------------------------------------------------------------------------------------------------------------------------|--------------|
|                 |                                   |                    | ampicillin, ticarcillin,<br>ceftazidime, cefoxitin                                                                      |              |
| Isolate 1586981 |                                   |                    |                                                                                                                         |              |
| 235             | ISPa7<br>Composite<br>transposon  | <i>fosA</i>        | fosfomycin                                                                                                              | ACWU01000146 |
|                 |                                   | <i>blaOXA-2</i>    | piperacillin,<br>amoxicillin+clavulanic acid,<br>ceftazidime,<br>ampicillin+clavulanic acid,<br>amoxicillin, ampicillin | DQ112222     |
|                 |                                   | <i>aac(6')-II</i>  | tobramycin, amikacin                                                                                                    | U13880       |
|                 |                                   | <i>qacE</i>        | cetylpyridinium chloride,<br>chlorhexidine, benzylkonium<br>chloride, ethidium bromide                                  | X68232       |
|                 |                                   | <i>aadA6</i>       | spectinomycin, streptomycin                                                                                             | AF140629     |
|                 |                                   | <i>sulI</i>        | sulfamethoxazole                                                                                                        | U12338       |
|                 |                                   | <i>aac (6')-31</i> | netilmicin, sisomicin,<br>neomycin, tobramycin,<br>isepamicin, gentamicin,<br>amikacin, kanamycin                       | AM283489     |
|                 |                                   | <i>catB7</i>       | chloramphenicol                                                                                                         | AF036933     |
|                 | ISPa7<br>Composite<br>transposon  | <i>aadA6</i>       | spectinomycin, streptomycin                                                                                             | AF140629     |
|                 |                                   | <i>sulI</i>        | sulfamethoxazole                                                                                                        | U12338       |
|                 |                                   | <i>aac(6')-31</i>  | netilmicin, sisomicin,<br>neomycin, tobramycin,<br>isepamicin, gentamicin,<br>amikacin, kanamycin                       | AM283489     |
|                 |                                   | <i>blaOXA-2</i>    | piperacillin,<br>amoxicillin+clavulanic acid,<br>ceftazidime,<br>ampicillin+clavulanic acid,<br>amoxicillin, ampicillin | DQ112222     |
|                 |                                   | <i>aac(6')-II</i>  | tobramycin, amikacin                                                                                                    | U13880       |
|                 |                                   | <i>qacE</i>        | cetylpyridinium chloride,<br>chlorhexidine, benzylkonium<br>chloride, ethidium bromide                                  | X68232       |
|                 | ISPa7<br>Composite<br>transposon  | <i>aadA6</i>       | spectinomycin, streptomycin                                                                                             | AF140629     |
|                 |                                   | <i>sulI</i>        | sulfamethoxazole                                                                                                        | U12338       |
|                 |                                   | <i>aac(6')-31</i>  | netilmicin, sisomicin,<br>neomycin, tobramycin,<br>isepamicin, gentamicin,<br>amikacin, kanamycin                       | AM283489     |
|                 |                                   | <i>blaOXA-2</i>    | piperacillin,<br>amoxicillin+clavulanic acid,<br>ceftazidime,<br>ampicillin+clavulanic acid,<br>amoxicillin, ampicillin | DQ112222     |
|                 |                                   | <i>aac(6')-II</i>  | tobramycin, amikacin                                                                                                    | U13880       |
|                 |                                   | <i>qacE</i>        | cetylpyridinium chloride,<br>chlorhexidine, benzylkonium<br>chloride, ethidium bromide                                  | X68232       |
| Isolate 1607533 |                                   |                    |                                                                                                                         |              |
| 234             | IS6100<br>Composite<br>transposon | <i>fosA</i>        | fosfomycin                                                                                                              | ACWU01000146 |
|                 |                                   | <i>aph(3'')-Ib</i> | streptomycin                                                                                                            | AF024602     |
|                 |                                   | <i>aph(6)-Id</i>   | streptomycin                                                                                                            | M28829       |

|                 |                                   |                      |                                                                                                                                                 |              |
|-----------------|-----------------------------------|----------------------|-------------------------------------------------------------------------------------------------------------------------------------------------|--------------|
|                 |                                   | <i>catB7</i>         | chloramphenicol                                                                                                                                 | AF036933     |
|                 |                                   | <i>crpP</i>          | ciprofloxacin                                                                                                                                   | HM560971     |
|                 | Tn5563<br>Unit transposon         | <i>qacE</i>          | ethidium bromide,<br>chlorhexidine,<br>cetylpyridinium chloride,<br>benzylkonium chloride                                                       | X68232       |
|                 |                                   | <i>ant(2'')-Ia</i>   | gentamicin, tobramycin                                                                                                                          | X04555       |
|                 |                                   | <i>sulI</i>          | sulfamethoxazole                                                                                                                                | X15024       |
|                 |                                   | <i>blaOXA-2</i>      | amoxicillin, piperacillin,<br>amoxicillin+clavulanic acid,<br>ampicillin+clavulanic acid,<br>ceftazidime, ampicillin                            | DQ112222     |
| Isolate 1690076 |                                   |                      |                                                                                                                                                 |              |
| 309             | Tn5563<br>Unit transposon         | <i>fosA</i>          | fosfomycin                                                                                                                                      | ACWU01000146 |
|                 |                                   | <i>aac(6')-33</i>    | tobramycin, amikacin                                                                                                                            | GQ337064     |
|                 |                                   | <i>qacE</i>          | chlorhexidine,<br>cetylpyridinium chloride,<br>ethidium bromide,<br>benzylkonium chloride                                                       | X68232       |
|                 |                                   | <i>sulI</i>          | sulfamethoxazole                                                                                                                                | X15024       |
|                 |                                   | <i>aac(6')-Ib-cr</i> | tobramycin, amikacin,<br>ciprofloxacin                                                                                                          | EF636461     |
|                 |                                   | <i>blaGES-19</i>     | ticarcillin, piperacillin,<br>cefoxitin, ceftazidime,<br>ampicillin+clavulanic acid,<br>amoxicillin, ampicillin,<br>amoxicillin+clavulanic acid | JN596280     |
|                 |                                   | <i>blaOXA-2</i>      | piperacillin, ceftazidime,<br>ampicillin+clavulanic acid,<br>amoxicillin, ampicillin,<br>amoxicillin+clavulanic acid                            | DQ112222     |
|                 |                                   | <i>aac(6')-Ib3</i>   | tobramycin, amikacin                                                                                                                            | X60321       |
|                 |                                   | <i>catB7</i>         | chloramphenicol                                                                                                                                 | AF036933     |
|                 |                                   | <i>ant(2'')-Ia</i>   | gentamicin, tobramycin                                                                                                                          | M95287       |
|                 |                                   | <i>blaGES-20</i>     | ticarcillin, piperacillin,<br>cefoxitin, ceftazidime,<br>ampicillin+clavulanic acid,<br>amoxicillin, ampicillin,<br>amoxicillin+clavulanic acid | JN596280     |
|                 | IS6100<br>Composite<br>transposon | <i>tet(G)</i>        | tetracycline, doxycycline                                                                                                                       | AF133139     |

<sup>a</sup> Transposable elements were identified using MobileElementFinder v1.0.3.

**Table S4.** MICs for aminoglycosides of *P. aeruginosa* containing pSW196<sup>a</sup>

| Isolate                             | Arabinose absent |      |      | Arabinose present |      |      |
|-------------------------------------|------------------|------|------|-------------------|------|------|
|                                     | Tob              | Gen  | Amik | Tob               | Gen  | Amik |
| <b>Laboratory reference strain</b>  |                  |      |      |                   |      |      |
| PAO1                                | 0.5              | 1    | 2    | 0.5               | 1    | 2    |
| PAO1 [pSW196]                       | 0.5              | 1    | 2    | 0.5               | 1    | 2    |
| PAO1 $\Delta$ mexXY                 | 0.25             | 0.25 | 0.5  | 0.25              | 0.25 | 0.5  |
| PAO1 $\Delta$ mexXY [pSW196]        | 0.25             | 0.25 | 0.5  | 0.25              | 0.25 | 0.5  |
| PAO1 $\Delta$ mexZ                  | 1                | 2    | 4    | 1                 | 2    | 4    |
| PAO1 $\Delta$ mexZ [pSW196]         | 1                | 2    | 4    | 1                 | 2    | 4    |
| PAO1fusAI <sub>R680C</sub>          | 2                | 4    | 8    | 2                 | 4    | 8    |
| PAO1fusAI <sub>R680C</sub> [pSW196] | 2                | 4    | 8    | 2                 | 4    | 8    |
| <b>Clinical Strains</b>             |                  |      |      |                   |      |      |
| 1257147                             | 512              | 256  | 512  | 512               | 256  | 512  |
| 1257147 [pSW196]                    | 512              | 256  | 512  | 512               | 256  | 512  |
| 1260990                             | 32               | 64   | 128  | 32                | 64   | 128  |
| 1260990 [pSW196]                    | 32               | 64   | 128  | 32                | 64   | 128  |
| 006A2                               | 32               | 32   | 128  | 32                | 32   | 128  |
| 006A2 [pSW196]                      | 32               | 32   | 128  | 32                | 32   | 128  |
| 403-107                             | 2                | 4    | 16   | 2                 | 4    | 16   |
| 403-107 [pSW196]                    | 2                | 4    | 16   | 2                 | 4    | 16   |
| 015A                                | 8                | 16   | 32   | 8                 | 16   | 32   |
| 015A [pSW196]                       | 8                | 16   | 32   | 8                 | 16   | 32   |

<sup>a</sup> MICs for tobramycin (Tob), gentamicin (Gen) and amikacin (Amik) were determined in triplicate, as described in the main text, and median values are shown.

**Table S5.** Bacterial isolates and plasmids used in this study.

| Strain                                             | Source                                                                                                                                                     | Patient Location/Sample Information | Bio Sample   | MLST Type | Reference        |
|----------------------------------------------------|------------------------------------------------------------------------------------------------------------------------------------------------------------|-------------------------------------|--------------|-----------|------------------|
| <b><i>P. aeruginosa</i> reference strain</b>       |                                                                                                                                                            |                                     |              |           |                  |
| PAO1                                               |                                                                                                                                                            |                                     | SAMN11606715 | 549       | [26]             |
| <b>Clinical isolates of <i>P. aeruginosa</i></b>   |                                                                                                                                                            |                                     |              |           |                  |
| 015A                                               | Adult CF                                                                                                                                                   | Dunedin                             | SAMN07424137 | 499       | [27,28]          |
| 403-105                                            | Adult CF                                                                                                                                                   | Brisbane                            | SAMN24255275 | 775       | [27]             |
| 403-107                                            | Adult CF                                                                                                                                                   | Brisbane                            | SAMN24255277 | 17        | [27]             |
| 006-A2                                             | Child CF                                                                                                                                                   | Brisbane                            | SAMN11606760 | 821       | [27,28]          |
| 008-A1                                             | Adult CF                                                                                                                                                   | Brisbane                            | SAMN11606756 | 775       | [27]             |
| 1257147                                            | Bladder                                                                                                                                                    | Argentina                           | SAMN15663255 | 235       | [29]             |
| 1260990                                            | Urine                                                                                                                                                      | Greece                              | SAMN15663259 | 395       | [29]             |
| 1268230                                            | Wound                                                                                                                                                      | Spain                               | SAMN15663262 | 175       | [29]             |
| 1271701                                            | Urine                                                                                                                                                      | Israel                              | SAMN15663264 | 1560      | [29]             |
| 1275655                                            | Wound                                                                                                                                                      | Mexico                              | SAMN15663267 | 235       | [29]             |
| 1295835                                            | Sputum                                                                                                                                                     | Italy                               | SAMN15663273 | 646       | [29]             |
| 1324459                                            | Burn                                                                                                                                                       | Romania                             | SAMN15663277 | 357       | [29]             |
| 1344658                                            | Respiratory                                                                                                                                                | Turkey                              | SAMN15663278 | 292       | [29]             |
| 1420275                                            | Respiratory                                                                                                                                                | Mexico                              | SAMN15663281 | 309       | [29]             |
| 1586994                                            | Blood                                                                                                                                                      | Belgium                             | SAMN15663287 | 235       | [29]             |
| 1607533                                            | Colon                                                                                                                                                      | Russia                              | SAMN15663288 | 234       | [29]             |
| 1690076                                            | Respiratory                                                                                                                                                | Mexico                              | SAMN15663290 | 309       | [29]             |
| <b><i>P. aeruginosa</i> engineered mutants</b>     |                                                                                                                                                            |                                     |              |           |                  |
| <b>Mutants</b>                                     | <b>Genotype/ relevant characteristics</b>                                                                                                                  |                                     |              |           | <b>Reference</b> |
| PAO1Δ <i>mexXY</i>                                 | Deletion of <i>mexXY</i> genes in reference strain PAO1                                                                                                    |                                     |              |           | [30]             |
| PAO1Δ <i>mexZ</i>                                  | Deletion of <i>mexZ</i> gene-in reference strain PAO1                                                                                                      |                                     |              |           | [30]             |
| PAO1 <i>fusA1</i> <sub>R680C</sub>                 | R680C mutation in elongation factor G <i>fusA1</i> of reference strain PAO1                                                                                |                                     |              |           | This study       |
| 015AΔ <i>mexXY</i>                                 | Deletion of <i>mexXY</i> genes from isolate 015A                                                                                                           |                                     |              |           | [30]             |
| 403-107Δ <i>mexXY</i>                              | Deletion of <i>mexXY</i> genes from isolate 403-107                                                                                                        |                                     |              |           | [30]             |
| 1257147Δ <i>mexXY</i>                              | Deletion of <i>mexXY</i> genes from isolate 1257147                                                                                                        |                                     |              |           | [30]             |
| 1260990Δ <i>mexXY</i>                              | Deletion of <i>mexXY</i> genes from isolate 1260990                                                                                                        |                                     |              |           | [30]             |
| 1257147 Δ <i>ant</i> (2'')-Ia                      | Deletion of aminoglycoside nucleotidyltransferases ( <i>ant</i> (2'')-Ia) from isolate 1257147                                                             |                                     |              |           | This study       |
| 1260990Δ <i>aac</i> (6')-Ib3                       | Deletion of aminoglycoside acetyltransferases ( <i>aac</i> (6')-Ib3) from isolate 1260990                                                                  |                                     |              |           | This study       |
| 1260990Δ <i>aph</i> (3')-VIa                       | Deletion of aminoglycoside phosphoryltransferases ( <i>aph</i> (3')-VIa) from isolate 1260990                                                              |                                     |              |           | This study       |
| 1260990Δ <i>aac</i> (6')-Ib3 Δ <i>aph</i> (3')-VIa | Deletion of aminoglycoside acetyltransferases ( <i>aac</i> (6')-Ib3) and aminoglycoside phosphoryltransferases ( <i>aph</i> (3')-VIa) from isolate 1260990 |                                     |              |           | This study       |

| <b><i>P. aeruginosa</i> carrying cloned genes encoding aminoglycoside modifying enzymes</b> |                                                                                                  |                  |
|---------------------------------------------------------------------------------------------|--------------------------------------------------------------------------------------------------|------------------|
| <b>Strains</b>                                                                              | <b>Genotype/ relevant characteristics</b>                                                        | <b>Reference</b> |
| PAO1 [pSW196]                                                                               | Strain PAO1 with pSW196 vector integrated at chromosomal <i>attB</i> site                        | This study       |
| PAO1 [pSW196:: <i>ant</i> (2'')- <i>Ia</i> ]                                                | Strain PAO1 expressing <i>ant</i> (2'')- <i>Ia</i>                                               | This study       |
| PAO1 [pSW196:: <i>aac</i> (6')- <i>Ib3</i> ]                                                | Strain PAO1 expressing <i>aac</i> (6')- <i>Ib3</i>                                               | This study       |
| PAO1 [pSW196- <i>aph</i> (3')- <i>VIa</i> ]                                                 | Strain PAO1 expressing <i>aph</i> (3')- <i>VIa</i>                                               | This study       |
| PAO1Δ <i>mexXY</i> [pSW196]                                                                 | PAO1Δ <i>mexXY</i> with pSW196 vector integrated at chromosomal <i>attB</i> site                 | This study       |
| PAO1Δ <i>mexXY</i> [pSW196:: <i>ant</i> (2'')- <i>Ia</i> ]                                  | PAO1Δ <i>mexXY</i> expressing <i>ant</i> (2'')- <i>Ia</i>                                        | This study       |
| PAO1Δ <i>mexXY</i> [pSW196:: <i>aac</i> (6')- <i>Ib3</i> ]                                  | PAO1Δ <i>mexXY</i> expressing <i>aac</i> (6')- <i>Ib3</i>                                        | This study       |
| PAO1Δ <i>mexXY</i> [pSW196:: <i>aph</i> (3')- <i>VIa</i> ]                                  | PAO1Δ <i>mexXY</i> expressing <i>aph</i> (3')- <i>VIa</i>                                        | This study       |
| PAO1Δ <i>mexZ</i> [pSW196]                                                                  | PAO1Δ <i>mexZ</i> with pSW196 vector integrated at chromosomal <i>attB</i> site                  | This study       |
| PAO1Δ <i>mexZ</i> [pSW196:: <i>ant</i> (2'')- <i>Ia</i> ]                                   | PAO1Δ <i>mexZ</i> expressing <i>ant</i> (2'')- <i>Ia</i>                                         | This study       |
| PAO1Δ <i>mexZ</i> [pSW196:: <i>aac</i> (6')- <i>Ib3</i> ]                                   | PAO1Δ <i>mexZ</i> expressing <i>aac</i> (6')- <i>Ib3</i>                                         | This study       |
| PAO1Δ <i>mexZ</i> [pSW196:: <i>aph</i> (3')- <i>VIa</i> ]                                   | PAO1Δ <i>mexZ</i> expressing <i>aph</i> (3')- <i>VIa</i>                                         | This study       |
| PAO1 <i>fusA1</i> <sub>R680C</sub> [pSW196]                                                 | PAO1 <i>fusA1</i> <sub>R680C</sub> with pSW196 vector integrated at chromosomal <i>attB</i> site | This study       |
| PAO1 <i>fusA1</i> <sub>R680C</sub> [pSW196:: <i>ant</i> (2'')- <i>Ia</i> ]                  | PAO1 <i>fusA1</i> <sub>R680C</sub> expressing <i>ant</i> (2'')- <i>Ia</i>                        | This study       |
| PAO1 <i>fusA1</i> <sub>R680C</sub> [pSW196:: <i>aac</i> (6')- <i>Ib3</i> ]                  | PAO1 <i>fusA1</i> <sub>R680C</sub> expressing <i>aac</i> (6')- <i>Ib3</i>                        | This study       |
| PAO1 <i>fusA1</i> <sub>R680C</sub> [pSW196:: <i>aph</i> (3')- <i>VIa</i> ]                  | PAO1 <i>fusA1</i> <sub>R680C</sub> expressing <i>aph</i> (3')- <i>VIa</i>                        | This study       |
| 006A2 [pSW196]                                                                              | 006A2 with pSW196 vector integrated at chromosomal <i>attB</i> site                              | This study       |
| 006A2 [pSW196:: <i>ant</i> (2'')- <i>Ia</i> ]                                               | 006A2 expressing <i>ant</i> (2'')- <i>Ia</i>                                                     | This study       |
| 006A2 [pSW196:: <i>aac</i> (6')- <i>Ib3</i> ]                                               | 006A2 expressing <i>aac</i> (6')- <i>Ib3</i>                                                     | This study       |
| 006A2 [pSW196:: <i>aph</i> (3')- <i>VIa</i> ]                                               | 006A2 expressing <i>aph</i> (3')- <i>VIa</i>                                                     | This study       |
| 006A2Δ <i>mexXY</i> [pSW196]                                                                | 006A2Δ <i>mexXY</i> with pSW196 vector integrated at chromosomal <i>attB</i> site                | This study       |

|                                                                                 |                                                                                     |            |
|---------------------------------------------------------------------------------|-------------------------------------------------------------------------------------|------------|
| 006A2Δ <i>mexXY</i><br>[pSW196:: <i>ant</i> (2'')- <i>Ia</i> ]                  | 006A2Δ <i>mexXY</i> expressing <i>ant</i> (2'')- <i>Ia</i>                          | This study |
| 006A2Δ <i>mexXY</i><br>[pSW196:: <i>aac</i> (6')- <i>Ib3</i> ]                  | 006A2Δ <i>mexXY</i> expressing <i>aac</i> (6')- <i>Ib3</i>                          | This study |
| 006A2Δ <i>mexXY</i> [pSW196:: <i>aph</i> (3')- <i>VIa</i> ]                     | 006A2Δ <i>mexXY</i> expressing <i>aph</i> (3')- <i>VIa</i>                          | This study |
| 403-107 [pSW196]                                                                | 403-107 with pSW196 vector integrated at chromosomal <i>attB</i> site               | This study |
| 403-107 [pSW196:: <i>ant</i> (2'')- <i>Ia</i> ]                                 | 403-107 expressing <i>ant</i> (2'')- <i>Ia</i>                                      | This study |
| 403-107 [pSW196:: <i>aac</i> (6')- <i>Ib3</i> ]                                 | 403-107 expressing <i>aac</i> (6')- <i>Ib3</i>                                      | This study |
| 403-107 [pSW196:: <i>aph</i> (3')- <i>VIa</i> ]                                 | 403-107 expressing <i>aph</i> (3')- <i>VIa</i>                                      | This study |
| 403-107Δ <i>mexXY</i><br>[pSW196]                                               | 403-107Δ <i>mexXY</i> with pSW196 vector integrated at chromosomal <i>attB</i> site | This study |
| 403-107Δ <i>mexXY</i> [pSW196:: <i>ant</i> (2'')- <i>Ia</i> ]                   | 403-107Δ <i>mexXY</i> expressing <i>ant</i> (2'')- <i>Ia</i>                        | This study |
| 403-107Δ <i>mexXY</i> [pSW196:: <i>aac</i> (6')- <i>Ib3</i> ]                   | 403-107Δ <i>mexXY</i> expressing <i>aac</i> (6')- <i>Ib3</i>                        | This study |
| 403-107Δ <i>mexXY</i> [pSW196:: <i>aph</i> (3')- <i>VIa</i> ]                   | 403-107Δ <i>mexXY</i> expressing <i>aph</i> (3')- <i>VIa</i>                        | This study |
| 015A [pSW196]                                                                   | 015A with pSW196 vector integrated at chromosomal <i>attB</i> site                  | This study |
| 015A [pSW196:: <i>ant</i> (2'')- <i>Ia</i> ]                                    | 015A expressing <i>ant</i> (2'')- <i>Ia</i>                                         | This study |
| 015A [pSW196:: <i>aac</i> (6')- <i>Ib3</i> ]                                    | 015A expressing <i>aac</i> (6')- <i>Ib3</i>                                         | This study |
| 015A [pSW196:: <i>aph</i> (3')- <i>VIa</i> ]                                    | 015A expressing <i>aph</i> (3')- <i>VIa</i>                                         | This study |
| 015AΔ <i>mexXY</i> [pSW196]                                                     | 015AΔ <i>mexXY</i> with pSW196 vector integrated at chromosomal <i>attB</i> site    | This study |
| 015AΔ <i>mexXY</i><br>[pSW196:: <i>ant</i> (2'')- <i>Ia</i> ]                   | 015AΔ <i>mexXY</i> expressing <i>ant</i> (2'')- <i>Ia</i>                           | This study |
| 015AΔ <i>mexXY</i><br>[pSW196:: <i>aac</i> (6')- <i>Ib3</i> ]                   | 015AΔ <i>mexXY</i> expressing <i>aac</i> (6')- <i>Ib3</i>                           | This study |
| 015AΔ <i>mexXY</i><br>[pSW196:: <i>aph</i> (3')- <i>VIa</i> ]                   | 015AΔ <i>mexXY</i> expressing <i>aph</i> (3')- <i>VIa</i>                           | This study |
| 1257147Δ <i>ant</i> (2'')- <i>Ia</i><br>[pSW196:: <i>ant</i> (2'')- <i>Ia</i> ] | 1257147Δ <i>ant</i> (2'')- <i>Ia</i> expressing <i>ant</i> (2'')- <i>Ia</i>         | This study |
| 1260990Δ <i>aac</i> (6')- <i>Ib3</i><br>[pSW196:: <i>aac</i> (6')- <i>Ib3</i> ] | 1260990Δ <i>aac</i> (6')- <i>Ib3</i> expressing <i>aac</i> (6')- <i>Ib3</i>         | This study |
| 1260990Δ <i>aph</i> (3')- <i>VIa</i><br>[pSW196:: <i>aph</i> (3')- <i>VIa</i> ] | 1260990Δ <i>aph</i> (3')- <i>VIa</i> expressing <i>aph</i> (3')- <i>VIa</i>         | This study |

| Strains of <i>Escherichia coli</i> |                                                                                                                    |            |
|------------------------------------|--------------------------------------------------------------------------------------------------------------------|------------|
| Strain                             | Genotype/ relevant characteristics                                                                                 | Reference  |
| JM83                               | <i>ara</i> , $\Delta(lac-proAB)$ <i>rpsL(strA)</i> , $\phi 80$ , <i>lacZ</i> $\Delta$ M15                          | [31]       |
| ST18                               | S 17 $\lambda$ pir $\Delta$ hemaA                                                                                  | [32]       |
| Plasmids used in the study         |                                                                                                                    |            |
| Plasmids                           | Genotype/ relevant characteristics                                                                                 | Reference  |
| pEX18Tc                            | pMB1 replicon, oriT <sup>a</sup> <i>sacB</i> <sup>b</sup> , Tc <sup>R</sup> <sup>c</sup> , allelic exchange vector | [33]       |
| pEX18Tc:: $\Delta$ mexXY           | pEX18Tc derivatives carrying <i>mexXY</i> (PA2018-PA2019) flanking regions                                         | This study |
| pEX18Tc:: $\Delta$ mexZ            | pEX18Tc derivatives carrying <i>mexZ</i> (PA2020) flanking regions                                                 | This study |
| pEX18Tc:: <i>fusA1</i> (R680C)     | pEX18Tc                                                                                                            | This study |
| pEX18Tc:: $\Delta$ ant (2'')-Ia    | pEX18Tc derivatives carrying ant (2'')-Ia flanking regions                                                         | This study |
| pEX18Tc:: $\Delta$ aac (6')-Ib3    | pEX18Tc derivatives carrying aac (6')-Ib3 flanking regions                                                         | This study |
| pEX18Tc:: $\Delta$ aph (3')-VIa    | pEX18Tc derivatives carrying aph (3')-VIa flanking regions                                                         | This study |
| pSW196                             | Site-specific integrative plasmid ( <i>attB</i> site), <i>araC</i> -pBAD cassette                                  | [34]       |
| pSW196:: <i>ant</i> (2'')-Ia       | pSW196 expressing arabinose-inducible <i>ant</i> (2'')-Ia                                                          | This study |
| pSW196:: <i>aac</i> (6')-Ib3       | pSW196 expressing arabinose-inducible <i>aac</i> (6')-Ib3                                                          | This study |
| pSW196:: <i>aph</i> (3')-VIa       | pSW196 expressing arabinose-inducible <i>aph</i> (3')-VIa                                                          | This study |



**Supplementary Table S6.** Primers used in this study.

| <b>Primers</b>   | <b>Sequences<sup>a</sup></b>                       |
|------------------|----------------------------------------------------|
| Ant (2)-Ia_F     | 5' CCCCC <u>GAATTC</u> GTGGCGGTTTTCATGGCTT 3'      |
| Ant (2)-Ia_R     | 5' GGGGG <u>GCGGCCGC</u> GCTTGGACGAATTGTTAGGC 3'   |
| Ant_F1F          | 5' CCCCC <u>GAATTC</u> GTGGCGGTTTTCATGGCTT 3'      |
| Ant_F1R          | 5' GGGGG <u>TCTAGA</u> AAGCAGGTTCGCAGTCAAGT 3'     |
| Ant_F2F          | 5' CCCCC <u>TCTAGA</u> CCGCTTTCAGGTCGCGATA 3'      |
| Ant_F2R          | 5' GGGGG <u>AAGCTT</u> GAAACTTGTATAGCGCCCCTTA 3'   |
| Ant_SF           | 5' GATGCGTGGAGACCGAAAC 3'                          |
| Ant_SR           | 5' ACCATGCACTGATTCACTGG 3'                         |
| Aac (6)-Ib_F     | 5' CCCCC <u>GAATTC</u> GCTGGACAGTCCCAGTCG 3'       |
| Aac (6)-Ib_R     | 5' GGGGG <u>GCGGCCGC</u> GATGGAAGGGTTAGGCATCA 3'   |
| Aac_F1F          | 5' CCCCC <u>GAATTC</u> CAGCGAGCCATTTGAGTCAA 3'     |
| Aac_F1R          | 5' GGGGG <u>GGTACC</u> GGAATCGTTGCTGTTGGTCA 3'     |
| Aac_F2F          | 5' CCCCC <u>GGTACC</u> TGCCTAACCTTCCATCGAG 3'      |
| Aac_F2R          | 5' GGGGG <u>AAGCTT</u> CATCGTGATCTCCGTTTCGTG 3'    |
| Aac_SF           | 5' TCTGGTGTGGGAAGTCTGAGTC 3'                       |
| Aac_SR           | 5' CCGGAATTTTCGCTGACTGTC 3'                        |
| Aph (3')-VIa_CF  | 5' GGGG <u>GCGGCCGC</u> TCATCTATTTACTAGGCCTCGCA 3' |
| Aph (3')-VIa_CR  | 5' GGGGG <u>GAGCTC</u> GGTGGTTTATGTCGCACTTCA 3'    |
| <i>Aph_F1_F</i>  | 5' CCCCC <u>GAGCTC</u> TGCCGCGAATGGTATTGAC 3'      |
| <i>Aph_F1_R</i>  | 5' CCCCC <u>TCTAGA</u> GAGAGGATGCATCGGAGGAA 3'     |
| <i>Aph_F2_F</i>  | 5' CCCCC <u>TCTAGA</u> TGGCTCTAAAACGCTGTTTCC 3'    |
| <i>Aph_F2_R1</i> | 5' CCCCC <u>AAGCTT</u> GTATCAGCTCAAGACGCCGT 3'     |
| <i>Aph_SR_F</i>  | 5' CGCACTTCAAGTTTTACTCTGC 3'                       |
| <i>Aph_SR_R</i>  | 5' TGGCTTTTGAAACTGTCGCA 3'                         |
| <i>mexXY_F1</i>  | 5' CCCCC <u>GGTACC</u> GAGTCGGCTGATG ACCTACA 3'    |
| <i>mexXY_R1</i>  | 5'GGGGG <u>TCTAGA</u> GTACCGCTGTTCTTCCTGGT 3'      |
| <i>mexXY_F2</i>  | 5' CCCCC <u>TCTAGAT</u> GTCCCTCGATTG GTGAACT 3'    |
| <i>mexXY_R2</i>  | 5' GGGGG <u>AAGCTT</u> GCTCTACATCGAC GGCAAG 3'     |
| <i>PA2017_F</i>  | 5' GCA GCC TGT ACG TGG TCA 3'                      |
| <i>mexZ_R</i>    | 5' GGG TTT TCT GGG ATT CCT CT 3'                   |
| <i>mexX_F</i>    | 5' CCCCC <u>GAATTC</u> GTTCTCGACGATCACCCACT 3'     |
| <i>mexX_R</i>    | 5' GGGGG <u>TCTAGA</u> GGGTTTCTGGGATTCTCT 3'       |
| <i>PA2022_F</i>  | 5' CCCCC <u>TCTAGA</u> CGCAGTTCTCCCTACCTGTT 3'     |
| <i>PA2022_R</i>  | 5' GGGGG <u>AAGCTT</u> CGCAGTATCTGGCTGTCGTA 3'     |
| <i>mexZ_SR_F</i> | 5' GTGTCCCTCGATTCTGTAAC 3'                         |

|                    |                                                 |
|--------------------|-------------------------------------------------|
| <i>mexZ_SR_R</i>   | 5' CGTGAAGCTACCGTGACAGA 3'                      |
| <i>fusA1_F</i>     | 5' GGGGG <u>TCTAGA</u> TTACTCGATGATCTTGGCAAC 3' |
| <i>fusA1_R</i>     | 5' CCCCC <u>AAGCTT</u> GAAGCCGAGATCAAGGAAGG 3'  |
| <i>fusA1_Scr_F</i> | 5' GTATTCAACGTGCGAGGTGT 3'                      |
| <i>fusA1_Scr_R</i> | 5' GTTCAAGATCGCTGCTTCCA 3'                      |
| <i>CTXmcsDown</i>  | 5' TGACTACGTGGTTCCTGGCCTG                       |
| <i>CTXmcsUP</i>    | 5' TTCAAAAGGTCATCCACCGGC                        |

<sup>a</sup>Introduced restriction sites are underlined.

**References are listed below.**

1. Yoshii, A.; Moriyama, H.; Fukuhara, T. The novel kasugamycin 2'-N-acetyltransferase gene aac (2')-IIa, carried by the IncP island, confers kasugamycin resistance to rice-pathogenic bacteria. *Appl Environ Microbiol.* **2012**, *78*, 5555-5564.
2. Haines, A.S.; Jones, K.; Cheung, M.; Thomas, C.M. The IncP-6 plasmid Rms149 consists of a small mobilizable backbone with multiple large insertions. *J Bacteriol.* **2005**, *187*, 4728-4738.
3. Gibb, A.P.; Tribuddharat, C.; Moore, R.A.; Louie, T.J.; Krulicki, W.; Livermore, D.M.; Palepou, M.-F.I.; Woodford, N. Nosocomial outbreak of carbapenem-resistant *Pseudomonas aeruginosa* with a new bla IMP allele, bla IMP-7. *Antimicrob Agents Chemother.* **2002**, *46*, 255-258.
4. Tenover, F.C.; Phillips, K.; Gilbert, T.; Lockhart, P.; O'Hara, P.; Plorde, J. Development of a DNA probe from the deoxyribonucleotide sequence of a 3-N-aminoglycoside acetyltransferase [AAC (3)-I] resistance gene. *Antimicrob Agents Chemother.* **1989**, *33*, 551-559.
5. MacLeod, D.L.; Nelson, L.E.; Shawar, R.M.; Lin, B.B.; Lockwood, L.G.; Dirks, J.E.; Miller, G.H.; Burns, J.L.; Garber, R.L. Aminoglycoside-resistance mechanisms for cystic fibrosis *Pseudomonas aeruginosa* isolates are unchanged by long-term, intermittent, inhaled tobramycin treatment. *J Infect Dis.* **2000**, *181*, 1180-1184.
6. Vliegthart, J.; Ketelaar-van Gaalen, P.; van de Klundert, J. Nucleotide sequence of the aacC3 gene, a gentamicin resistance determinant encoding aminoglycoside-(3)-N-acetyltransferase III expressed in *Pseudomonas aeruginosa* but not in *Escherichia coli*. *Antimicrob Agents Chemother.* **1991**, *35*, 892-897.
7. Plattner, M.; Gysin, M.; Haldimann, K.; Becker, K.; Hobbie, S.N. Epidemiologic, phenotypic, and structural characterization of aminoglycoside-resistance gene aac (3)-IV. *Int J Mol Sci.* **2020**, *21*, 6133.
8. Casin, I.; Bordon, F.; Bertin, P.; Coutrot, A.; Podglajen, I.; Brasseur, R.; Collatz, E. Aminoglycoside 6'-N-acetyltransferase variants of the Ib type with altered substrate profile in clinical isolates of *Enterobacter cloacae* and *Citrobacter freundii*. *Antimicrob Agents Chemother.* **1998**, *42*, 209-215.
9. Rather, P.; Munayyer, H.; Mann, P.; Hare, R.; Miller, G.; Shaw, K. Genetic analysis of bacterial acetyltransferases: identification of amino acids determining the specificities of the aminoglycoside 6'-N-acetyltransferase Ib and IIa proteins. *J Bacteriol.* **1992**, *174*, 3196-3203.
10. Poole, K. Aminoglycoside resistance in *Pseudomonas aeruginosa*. *Antimicrob Agents Chemother.* **2005**, *49*, 479-487.
11. Mendes, R.E.; Castanheira, M.; Toleman, M.A.; Sader, H.S.; Jones, R.N.; Walsh, T.R. Characterization of an integron carrying blaIMP-1 and a new aminoglycoside resistance gene, aac (6')-31, and its dissemination among genetically unrelated clinical isolates in a Brazilian hospital. *Antimicrob Agents Chemother.* **2007**, *51*, 2611-2614.
12. Viedma, E.; Juan, C.; Acosta, J.; Zamorano, L.; Otero, J.R.; Sanz, F.; Chaves, F.; Oliver, A. Nosocomial spread of colistin-only-sensitive sequence type 235 *Pseudomonas aeruginosa* isolates producing the extended-spectrum  $\beta$ -lactamases GES-1 and GES-5 in Spain. *Antimicrob Agents Chemother.* **2009**, *53*, 4930-4933.
13. Hollingshead, S.; Vapnek, D. Nucleotide sequence analysis of a gene encoding a streptomycin/spectinomycin adenyltransferase. *Plasmid.* **1985**, *13*, 17-30.
14. Gu, B.; Tong, M.; Zhao, W.; Liu, G.; Ning, M.; Pan, S.; Zhao, W. Prevalence and characterization of class I integrons among *Pseudomonas aeruginosa* and *Acinetobacter baumannii* isolates from patients in Nanjing, China. *J Clin Microbiol.* **2007**, *45*, 241-243.
15. Kazama, H.; Kizu, K.; Iwasaki, M.; Hamashima, H.; Sasatsu, M.; Arai, T. A new gene, aadA2b, encoding an aminoglycoside adenyltransferase, AAD (3'')(9), isolated from integron InC in *Pseudomonas aeruginosa*. *Microbios.* **1996**, *86*, 77-83.

16. Adrian, P.V.; Thomson, C.J.; Klugman, K.P.; Amyes, S.G. New gene cassettes for trimethoprim resistance, *df*r13, and streptomycin-spectinomycin resistance, *aadA*4, inserted on a class 1 integron. *Antimicrob Agents Chemother.* **2000**, *44*, 355-361.
17. Papadovasilaki, M.; Oberthür, D.; Gessmann, R.; Sarrou, I.; Betzel, C.; Scoulica, E.; Petratos, K. Biophysical and enzymatic properties of aminoglycoside adenylyltransferase *AadA6* from *Pseudomonas aeruginosa*. *Biochem Biophys Rep.* **2015**, *4*, 152-157.
18. Santanam, P.; Kayser, F.H. Purification and characterization of an aminoglycoside inactivating enzyme from *Staphylococcus epidermidis* FK109 that nucleotidylates the 4'-and 4''-hydroxyl groups of the aminoglycoside antibiotics. *J Antibiot.* **1978**, *31*, 343-351.
19. Esparragón, F.R.; Martín, M.G.; Lama, Z.G.; Sabatelli, F.J.; Junco, M.T.T. Aminoglycoside resistance mechanisms in clinical isolates of *Pseudomonas aeruginosa* from the Canary Islands. *Zentralbl Bakteriol.* **2000**, *289*, 817-826.
20. Woegerbauer, M.; Kuffner, M.; Domingues, S.; Nielsen, K.M. Involvement of *aph* (3')-IIa in the formation of mosaic aminoglycoside resistance genes in natural environments. *Front Microbiol.* **2015**, *6*, 442.
21. Lambert, T.; Gerbaud, G.; Courvalin, P. Characterization of transposon Tn1528, which confers amikacin resistance by synthesis of aminoglycoside 3'-O-phosphotransferase type VI. *Antimicrob Agents Chemother.* **1994**, *38*, 702-706.
22. Stogios, P.J.; Shakya, T.; Evdokimova, E.; Savchenko, A.; Wright, G.D. Structure and function of APH (4)-Ia, a hygromycin B resistance enzyme. *J Biol Chem.* **2011**, *286*, 1966-1975.
23. Ashenafi, M.; Ammosova, T.; Nekhai, S.; Byrnes, W.M. Purification and characterization of aminoglycoside phosphotransferase APH (6)-Id, a streptomycin-inactivating enzyme. *Mol Cell Biochem.* **2014**, *387*, 207-216.
24. Bortolaia, V.; Kaas, R.S.; Ruppe, E.; Roberts, M.C.; Schwarz, S.; Cattoir, V.; Philippon, A.; Allesoe, R.L.; Rebelo, A.R.; Florensa, A.F. ResFinder 4.0 for predictions of phenotypes from genotypes. *J Antimicrob Chemother.* **2020**, *75*, 3491-3500.
25. Alcock, B.P.; Raphenya, A.R.; Lau, T.T.; Tsang, K.K.; Bouchard, M.; Edalatmand, A.; Huynh, W.; Nguyen, A.-L.V.; Cheng, A.A.; Liu, S. CARD 2020: antibiotic resistome surveillance with the comprehensive antibiotic resistance database. *Nucleic Acids Res.* **2020**, *48*, D517-D525.
26. Stover, C.K.; Pham, X.Q.; Erwin, A.; Mizoguchi, S.; Warrenner, P.; Hickey, M.; Brinkman, F.; Hufnagle, W.; Kowalik, D.; Lagrou, M. Complete genome sequence of *Pseudomonas aeruginosa* PAO1, an opportunistic pathogen. *Nature.* **2000**, *406*, 959-964.
27. Martin, L.W.; Robson, C.L.; Watts, A.M.; Gray, A.R.; Wainwright, C.E.; Bell, S.C.; Ramsay, K.A.; Kidd, T.J.; Reid, D.W.; Brockway, B. Expression of *Pseudomonas aeruginosa* antibiotic resistance genes varies greatly during infections in cystic fibrosis patients. *Antimicrob Agents Chemother.* **2018**, *62*, e01789-01718.
28. Wardell, S.J.; Rehman, A.; Martin, L.W.; Winstanley, C.; Patrick, W.M.; Lamont, I.L. A large-scale whole-genome comparison shows that experimental evolution in response to antibiotics predicts changes in naturally evolved clinical *Pseudomonas aeruginosa*. *Antimicrob Agents Chemother.* **2019**, *63*, e01619-01619.
29. Rehman, A.; Jeukens, J.; Levesque, R.C.; Lamont, I.L. Gene-gene interactions dictate ciprofloxacin resistance in *Pseudomonas aeruginosa* and facilitate prediction of resistance phenotype from genome sequence data. *Antimicrob Agents Chemother.* **2021**, AAC. 02696-02620.
30. Thacharodi, A.; Lamont, I.L. Aminoglycoside resistance in *Pseudomonas aeruginosa*: the contribution of the MexXY-OprM efflux pump varies between isolates. *J Med Microbiol* **2022**, (In press).
31. Yanisch-Perron, C.; Vieira, J.; Messing, J. Improved M13 phage cloning vectors and host strains: nucleotide sequences of the M13mpl8 and pUC19 vectors. *Gene.* **1985**, *33*, 103-119.

32. Thoma, S.; Schobert, M. An improved *Escherichia coli* donor strain for diparental mating. *FEMS Microbiol Lett.* **2009**, *294*, 127-132.
33. Hoang, T.T.; Karkhoff-Schweizer, R.R.; Kutchma, A.J.; Schweizer, H.P. A broad-host-range Flp-FRT recombination system for site-specific excision of chromosomally-located DNA sequences: application for isolation of unmarked *Pseudomonas aeruginosa* mutants. *Gene.* **1998**, *212*, 77-86.
34. Baynham, P.J.; Ramsey, D.M.; Gvozdyev, B.V.; Cordonnier, E.M.; Wozniak, D.J. The *Pseudomonas aeruginosa* ribbon-helix-helix DNA-binding protein AlgZ (AmrZ) controls twitching motility and biogenesis of type IV pili. *J Bacteriol.* **2006**, *188*, 132-140, doi:10.1128/JB.188.1.132-140.2006.
